# Supplementary material for: Organocatalyzed ring-opening copolymerization of α-bromo-γ-butyrolactone with ε-caprolactone for the synthesis of functional aliphatic polyesters – pre-polymers for graft copolymerization
Source: Des Monomers Polym. 2018 Nov 29;21(1):193–201. doi: 10.1080/15685551.2018.1550288 (PMC6282472; doi:10.1080/15685551.2018.1550288)
Supplement: Supplemental Material [file TDMP_A_1550288_SM4329.doc]

**Supporting Information for**

**Organocatalyzed ring-opening copolymerization of α-bromo-γ-**

**butyrolactone with ε-caprolactone for the synthesis of functional aliphatic polyesters – pre-polymers for graft copolymerization**

Chen Gaoa,b, Chi-Hui Tsoua,b, Chun-Yan Zenga,b, Li Yuana,b, Rui Penga, Xue-Mei Zhanga,b,***

*aCollege of Materials Science and Engineering, Sichuan University of Science and Engineering, Zigong, Sichuan Province, China*

*bMaterial Corrosion and Protection Key Laboratory of Sichuan Province, Zigong, Sichuan Province, China*

* Corresponding author

E-mail address: 798538268@zju.edu.cn (Xue-Mei Zhang)

Fig. S1 1H NMR spectrum of PEGCB1.

Fig. S2 1H NMR spectrum of PEGCB2.

Fig. S3 1H NMR spectrum of PEGCB4.

Fig. S4 1H NMR spectrum of PEGCB5.

Fig. S5 1H NMR spectrum of PEGCB6.

Fig. S6 1H NMR spectrum of PEGCB7.

Fig. S7 1H NMR spectrum of PEGCB8.
